# Supplementary material for: Ambient Air Pollution and Autism in Los Angeles County, California
Source: PubMed Central journal article supplement (PMC3621187; doi:10.1289/ehp.1205827), 2012-12-18
Supplement: ehp.1205827.s001.pdf [file ehp.1205827.s001.pdf]

**Supplemental Material:****Ambient Air Pollution and Autism in Los Angeles County, California**

Tracy Ann Becerra<sup>1</sup>, Michelle Wilhelm<sup>1</sup>, Jørn Olsen<sup>1</sup>, Myles Cockburn<sup>2</sup>, Beate Ritz<sup>1</sup>

<sup>1</sup> Department of Epidemiology, Fielding School of Public Health, University of California, Los Angeles, California, USA

<sup>2</sup> Department of Preventive Medicine, Keck School of Medicine, University of Southern California, California, USA

**Table of Contents**

|                                  |                                                                                                                                                                       |       |
|----------------------------------|-----------------------------------------------------------------------------------------------------------------------------------------------------------------------|-------|
| Supplemental Material, Table S1: | Results of birth certificate residential address geocoding                                                                                                            | Pg. 2 |
| Supplemental Material, Table S2: | Exclusion criteria used when estimating pregnancy period specific monitor-based air pollution exposure metrics                                                        | Pg. 3 |
| Supplemental Material, Table S3: | Pollutant distributions and Pearson's correlation coefficients for entire pregnancy averages in controls                                                              | Pg. 4 |
| Supplemental Material, Table S4: | Associations between trimester average air pollution exposure during pregnancy and Autistic Disorder, conditional logistic regression analysis using matched controls | Pg. 5 |

| Supplemental Material, Table S1. Results of birth certificate residential address geocoding. |                                               |                                 |
|----------------------------------------------------------------------------------------------|-----------------------------------------------|---------------------------------|
| Mapping level                                                                                | Autistic Disorder cases<br>(n=7,603)<br>n (%) | Controls<br>(n=75,782)<br>n (%) |
| Parcel centroid                                                                              | 3578 (47.1)                                   | 34658 (45.7)                    |
| Uniform lot interpolation                                                                    | 1537 (20.2)                                   | 14865 (19.6)                    |
| Address range interpolation                                                                  | 2054 (27.0)                                   | 21375 (28.2)                    |
| Zip code tabulation area centroid, city centroid, or county subdivision centroid             | 425 (5.6)                                     | 4737 (6.2)                      |
| Not geocoded                                                                                 | 9 (0.1)                                       | 147 (0.2)                       |

| Supplemental Material, Table S2. Exclusion criteria used when estimating pregnancy period specific monitor-based air pollution exposure metrics. |                               |                                                                                                                                                                                                                                                                     |
|--------------------------------------------------------------------------------------------------------------------------------------------------|-------------------------------|---------------------------------------------------------------------------------------------------------------------------------------------------------------------------------------------------------------------------------------------------------------------|
| Pollutant                                                                                                                                        | Data Availability             | Criteria                                                                                                                                                                                                                                                            |
| CO                                                                                                                                               | hourly                        | <i>Criteria for hourly measurements:</i><br>At least 50% of hourly values available per 24-hr period and at least 50% of hourly values available from 6am-6pm. If sufficient data were available, a daily (24-hour) average was generated based on the hourly data. |
|                                                                                                                                                  |                               | <i>Criteria for pregnancy periods:</i><br>We required at least 15 readings for each full month in a given period (trimester or entire pregnancy) as well as 15 readings during the last 30 days of the pregnancy period.                                            |
| NO, NO <sub>2</sub> ,                                                                                                                            | hourly                        | <i>Criteria for hourly measurements:</i><br>At least 50% of hourly values available per 24-hr period and at least 50% of hourly values available from 8am-8pm.                                                                                                      |
|                                                                                                                                                  |                               | <i>Criteria for pregnancy periods:</i><br>We required at least 15 readings for each full month in a given period (trimester or entire pregnancy) as well as 15 readings during the last 30 days of the pregnancy period.                                            |
| O <sub>3</sub> (10am-6pm)                                                                                                                        | hourly                        | <i>Criteria for hourly measurements:</i><br>At least 50% of hourly values available from 10am-6pm.                                                                                                                                                                  |
|                                                                                                                                                  |                               | <i>Criteria for pregnancy periods:</i><br>We required at least 15 readings for each full month in a given period (trimester or entire pregnancy) as well as 15 readings during the last 30 days of the pregnancy period.                                            |
| PM <sub>10</sub>                                                                                                                                 | 24-hour average, every 6 days | <i>We required 3 or more values to be available per each full pregnancy month and during the last 30 days of pregnancy.</i>                                                                                                                                         |
| PM <sub>2.5</sub>                                                                                                                                | 24-hour average, every 3 days | <i>We required 5 or more values to be available per each full pregnancy month and during the last 30 days of pregnancy.</i>                                                                                                                                         |

| Supplemental Material, Table S3. Pollutant distributions and Pearson's correlation coefficients for entire pregnancy averages in controls |       |      |       |      |                                    |                      |                    |                      |                     |       |                 |       |                  |                   |
|-------------------------------------------------------------------------------------------------------------------------------------------|-------|------|-------|------|------------------------------------|----------------------|--------------------|----------------------|---------------------|-------|-----------------|-------|------------------|-------------------|
|                                                                                                                                           |       |      |       |      | Pearson's Correlation Coefficients |                      |                    |                      |                     |       |                 |       |                  |                   |
|                                                                                                                                           |       |      |       |      | U-LUR <sup>b</sup>                 |                      | S-LUR <sup>c</sup> |                      | Criteria Pollutants |       |                 |       |                  |                   |
|                                                                                                                                           |       |      |       |      | LUR - NO                           | LUR- NO <sub>2</sub> | LUR - NO           | LUR- NO <sub>2</sub> | CO                  | NO    | NO <sub>2</sub> | Ozone | PM <sub>10</sub> | PM <sub>2.5</sub> |
| Pollutant <sup>a</sup>                                                                                                                    | n     | Mean | IQR   | SD   |                                    |                      |                    |                      |                     |       |                 |       |                  |                   |
| U-LUR - NO <sup>b</sup>                                                                                                                   | 75623 | 22.4 | 9.40  | 8.3  | 1.00                               |                      |                    |                      |                     |       |                 |       |                  |                   |
| U-LUR- NO <sub>2</sub> <sup>b</sup>                                                                                                       | 75623 | 22.9 | 5.41  | 4.5  | 0.81                               | 1.00                 |                    |                      |                     |       |                 |       |                  |                   |
| S-LUR - NO <sup>c</sup>                                                                                                                   | 64129 | 28.7 | 18.46 | 14.7 | 0.77                               | 0.62                 | 1.00               |                      |                     |       |                 |       |                  |                   |
| S-LUR- NO <sub>2</sub> <sup>c</sup>                                                                                                       | 64128 | 28.0 | 9.70  | 7.3  | 0.66                               | 0.70                 | 0.71               | 1.00                 |                     |       |                 |       |                  |                   |
| CO                                                                                                                                        | 75565 | 1.0  | 0.55  | 0.5  | 0.27                               | 0.26                 | 0.56               | 0.53                 | 1.00                |       |                 |       |                  |                   |
| NO                                                                                                                                        | 75565 | 39.2 | 29.67 | 20.5 | 0.37                               | 0.31                 | 0.70               | 0.44                 | 0.78                | 1.00  |                 |       |                  |                   |
| NO <sub>2</sub>                                                                                                                           | 75565 | 30.8 | 10.47 | 7.6  | 0.35                               | 0.43                 | 0.58               | 0.73                 | 0.77                | 0.73  | 1.00            |       |                  |                   |
| Ozone                                                                                                                                     | 75565 | 36.8 | 11.54 | 8.9  | -0.33                              | -0.23                | -0.57              | -0.34                | -0.55               | -0.73 | -0.50           | 1.00  |                  |                   |
| PM <sub>10</sub>                                                                                                                          | 69263 | 36.3 | 8.25  | 6.1  | 0.11                               | 0.23                 | 0.30               | 0.55                 | 0.42                | 0.28  | 0.57            | -0.17 | 1.00             |                   |
| PM <sub>2.5</sub>                                                                                                                         | 59483 | 19.6 | 4.68  | 3.5  | 0.22                               | 0.26                 | 0.45               | 0.52                 | 0.60                | 0.58  | 0.65            | -0.47 | 0.58             | 1.00              |

<sup>a</sup> Pollutant values are expressed in the following units: CO ppm; NO, NO<sub>2</sub>, ppb; PM, µg/m<sup>3</sup>

<sup>b</sup> Unseasonalized Land Use Regression

<sup>c</sup> Seasonalized Land Use Regression

Supplemental Material, Table S4. Associations between trimester average air pollution exposure during pregnancy and Autistic Disorder, conditional logistic regression analysis using matched controls

| Exposure Metric                       | IQR <sup>b</sup>      | Adjusted <sup>a</sup> |                   |
|---------------------------------------|-----------------------|-----------------------|-------------------|
|                                       |                       | N (case/control)      | OR (95% CI)       |
| S-LUR-NO, 1st trimester               | 18.5ppb               | 6281/52173            | 1.01 (0.98, 1.04) |
| S-LUR-NO, 2nd trimester               | 18.5ppb               | 6281/52173            | 1.01 (0.98, 1.04) |
| S-LUR-NO, 3rd trimester               | 18.5ppb               | 6246/51897            | 0.99 (0.96, 1.03) |
| S-LUR-NO <sub>2</sub> , 1st trimester | 9.7ppb                | 6281/52173            | 1.03 (0.98, 1.08) |
| S-LUR-NO <sub>2</sub> , 2nd trimester | 9.7ppb                | 6281/52173            | 1.03 (0.98, 1.08) |
| S-LUR-NO <sub>2</sub> , 3rd trimester | 9.7ppb                | 6246/51897            | 1.04 (0.98, 1.09) |
| CO, 1st trimester                     | 0.55ppm               | 7421/72253            | 1.01 (0.98, 1.05) |
| CO, 2nd trimester                     | 0.55ppm               | 7421/72253            | 0.99 (0.95, 1.02) |
| CO, 3rd trimester                     | 0.55ppm               | 7383/71912            | 0.98 (0.94, 1.02) |
| NO, 1st trimester                     | 29.67ppb              | 7421/72253            | 1.02 (0.99, 1.05) |
| NO, 2nd trimester                     | 29.67ppb              | 7421/72253            | 1.00 (0.97, 1.03) |
| NO, 3rd trimester                     | 29.67ppb              | 7383/71912            | 0.98 (0.95, 1.02) |
| NO <sub>2</sub> , 1st trimester       | 10.47ppb              | 7421/72253            | 1.04 (0.99, 1.08) |
| NO <sub>2</sub> , 2nd trimester       | 10.47ppb              | 7421/72253            | 1.01 (0.97, 1.06) |
| NO <sub>2</sub> , 3rd trimester       | 10.47ppb              | 7383/71912            | 1.02 (0.97, 1.07) |
| Ozone (O <sub>3</sub> ), 1st tri      | 11.54ppb              | 7421/72253            | 1.00 (0.97, 1.03) |
| Ozone (O <sub>3</sub> ), 2nd tri      | 11.54ppb              | 7421/72253            | 1.02 (1.00, 1.05) |
| Ozone (O <sub>3</sub> ), 3rd tri      | 11.54ppb              | 7383/71912            | 1.04 (1.01, 1.06) |
| PM <sub>10</sub> , 1st trimester      | 8.25µg/m <sup>3</sup> | 6795/63662            | 1.00 (0.96, 1.05) |
| PM <sub>10</sub> , 2nd trimester      | 8.25µg/m <sup>3</sup> | 6795/63662            | 1.01 (0.97, 1.06) |
| PM <sub>10</sub> , 3rd trimester      | 8.25µg/m <sup>3</sup> | 6752/63259            | 1.02 (0.98, 1.06) |
| PM <sub>2.5</sub> , 1st trimester     | 4.68µg/m <sup>3</sup> | 5840/55776            | 1.04 (0.99, 1.08) |
| PM <sub>2.5</sub> , 2nd trimester     | 4.68µg/m <sup>3</sup> | 5840/55776            | 1.02 (0.98, 1.06) |
| PM <sub>2.5</sub> , 3rd trimester     | 4.68µg/m <sup>3</sup> | 5811/55512            | 1.03 (0.99, 1.08) |

<sup>a</sup> Adjusted for: maternal age, education, race/ethnicity, maternal place of birth; type of birth, parity, insurance type, gestational weeks at birth (continuous)

<sup>b</sup> Pollutant-specific entire-pregnancy IQR used as standard for trimester specific IQR
